# Supplementary material for: Facile Synthesis and Electrochemical Analysis of Zn‐Doped V2O5 Anode Materials for High‐Rate Li Storage
Source: Hindawi journal article supplement (doi:10.1155/2024/2441193), 2024-01-01
Supplement: f1 [file 2441193.f1.pdf]

# **Supplementary material**

## **Facile synthesis and electrochemical analysis of Zn-doped V<sub>2</sub>O<sub>5</sub> anode materials for high-rate Li storage**

Yong-Jin Jang, Hyungeun Seo, and Jae-Hun Kim\*

School of Materials Science and Engineering, Kookmin University, Seoul 02707, Republic of  
Korea

\*Corresponding author.

E-mail address: jaehunkim@kookmin.ac.kr (J.-H. Kim)

Table S1. Crystallite size calculation using Debye-Scherrer equation.

| Sample                           | 2 $\theta$ (°) | hkl | FWHM<br>( $\beta$ ) (°) | FWHM<br>( $\beta$ ) (rad) | Crystallite size<br>(nm) |
|----------------------------------|----------------|-----|-------------------------|---------------------------|--------------------------|
| V <sub>2</sub> O <sub>5</sub>    | 20.52          | 001 | 0.09                    | 0.00157                   | 89.8                     |
|                                  | 26.38          | 110 | 0.085                   | 0.00148                   | 96.2                     |
| Zn-V <sub>2</sub> O <sub>5</sub> | 20.49          | 001 | 0.08                    | 0.00140                   | 100.6                    |
|                                  | 26.34          | 110 | 0.07                    | 0.00122                   | 116.7                    |

To determine the particle size of V<sub>2</sub>O<sub>5</sub> and Zn-V<sub>2</sub>O<sub>5</sub> samples, we calculated the particle size of both samples from the XRD and TEM analysis results. The particle size of both samples from the XRD results based on the Debye-Scherrer equation can be calculated as follows [S1, S2]:

$$D = \frac{k\lambda}{\beta \cos \theta}$$

Where D is the crystallite size (nm),  $k$  is a Scherrer constant (0.9),  $\lambda$  is the wavelength of the X-rays used (0.154 nm),  $\beta$  is the Full Width at Half Maximum (FWHM, radians), and  $\theta$  is the peak position (radians). Based on the calculation results, the mean crystallite size of V<sub>2</sub>O<sub>5</sub> was found to be lower, compared to that of Zn-V<sub>2</sub>O<sub>5</sub>.

[S1] A. O. Bokuninaeva, and A. S. Vorokh, "Estimation of particle size using the Debye equation and the Scherrer formula for polyphasic TiO<sub>2</sub> powder," Journal of Physics: Conference Series, vol. 1410, no. 1, pp. 012057, 2019.

[S2] S. Fatimah, R. Ragadhita, D. F. Al Husaeni, and A. B. D. Nandiyanto, "How to calculate crystallite size from x-ray diffraction (XRD) using Scherrer method," ASEAN Journal of Science and Engineering, vol. 2, no. 1, pp. 65-76, 2022.

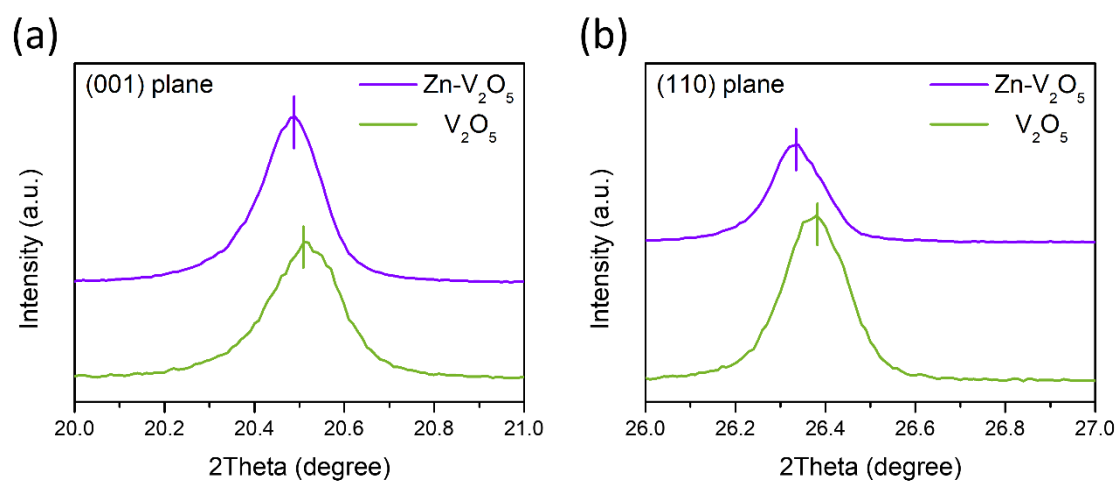

Figure S1. Enlarged XRD patterns of the Zn-V<sub>2</sub>O<sub>5</sub> and V<sub>2</sub>O<sub>5</sub> samples.

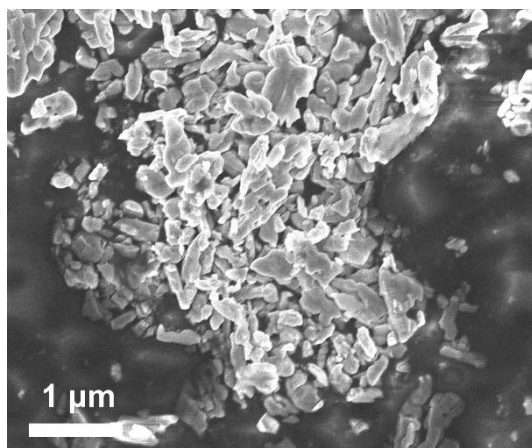

Figure S2. FE-SEM image of the V<sub>2</sub>O<sub>5</sub> sample.

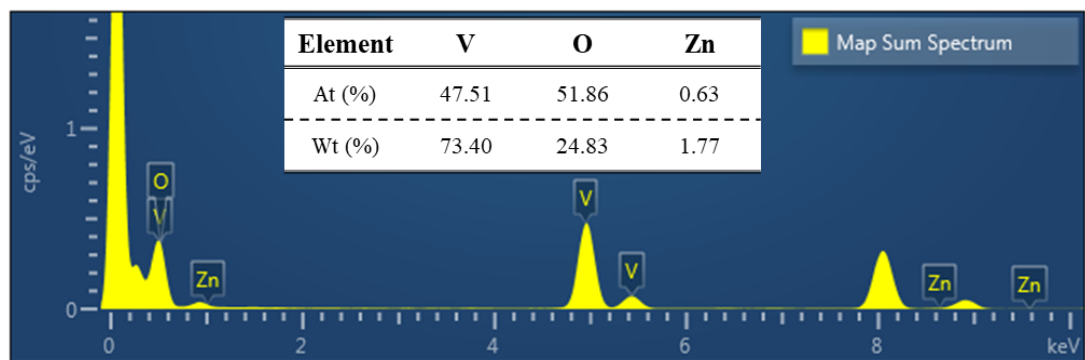

Figure S3. EDS results of the Zn-V<sub>2</sub>O<sub>5</sub> sample.

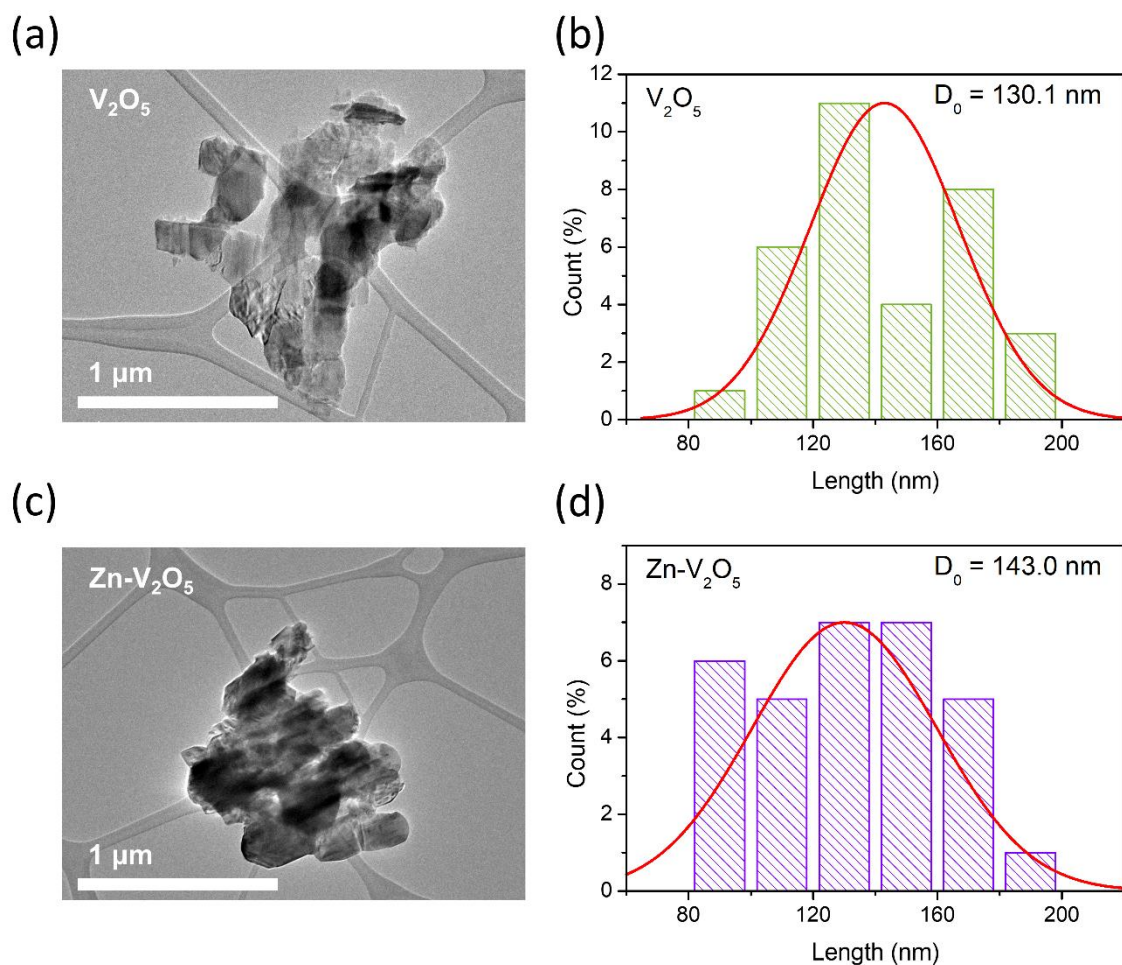

Figure S4. TEM images of the (a)  $V_2O_5$  and (c)  $Zn-V_2O_5$  samples. Particle size distribution plots obtained from TEM images of the (b)  $V_2O_5$  and (d)  $Zn-V_2O_5$  samples.

Figure S4 presents the TEM images and particle size distribution plots derived from the TEM images. The TEM images confirm the aggregation of nanoparticles in the order of hundreds of nanometers, forming larger particles in the micrometer range (Figure S4a and c). The mean particle sizes of the  $V_2O_5$  and  $Zn-V_2O_5$  samples were calculated to be 130.1 and 143.0 nm, respectively (Figure S4b and d). The particle size of  $V_2O_5$  was observed to be smaller than that of  $Zn-V_2O_5$ , consistent with the results obtained from the XRD patterns. The mean particle sizes of the samples slightly differ from the values obtained using the Debye-Scherrer equation, likely due to measurement errors.

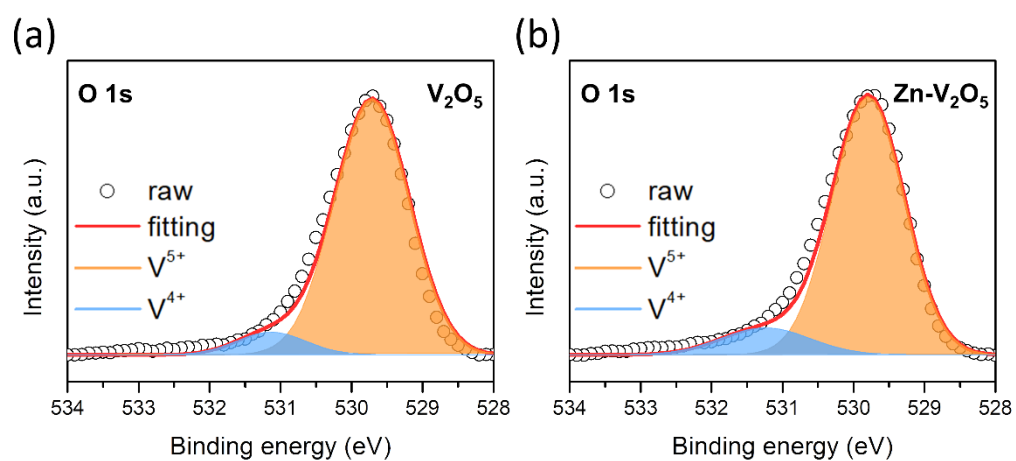

Figure S5. O 1s XPS core-level spectra for the (a)  $V_2O_5$  and (b)  $Zn-V_2O_5$  samples.

Table S2. Abundance ratio for the O valence states observed in the O 1s XPS spectra of the  $\text{V}_2\text{O}_5$  and  $\text{Zn-V}_2\text{O}_5$  samples.

| Sample                    | Peak indexing | $\text{V}^{5+}$ | $\text{V}^{4+}$ |
|---------------------------|---------------|-----------------|-----------------|
| $\text{V}_2\text{O}_5$    | Peak (eV)     | 529.8           | 531.2           |
|                           | Area (%)      | 92.5            | 7.5             |
| $\text{Zn-V}_2\text{O}_5$ | Peak (eV)     | 529.9           | 531.2           |
|                           | Area (%)      | 88.6            | 11.4            |

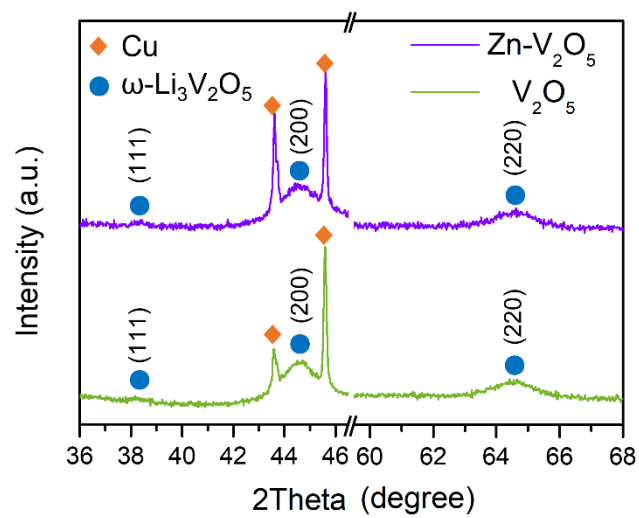

Figure S6. *Ex situ* XRD profiles of the  $\text{V}_2\text{O}_5$  and  $\text{Zn-V}_2\text{O}_5$  electrodes at a cutoff voltage of 1.9 V.

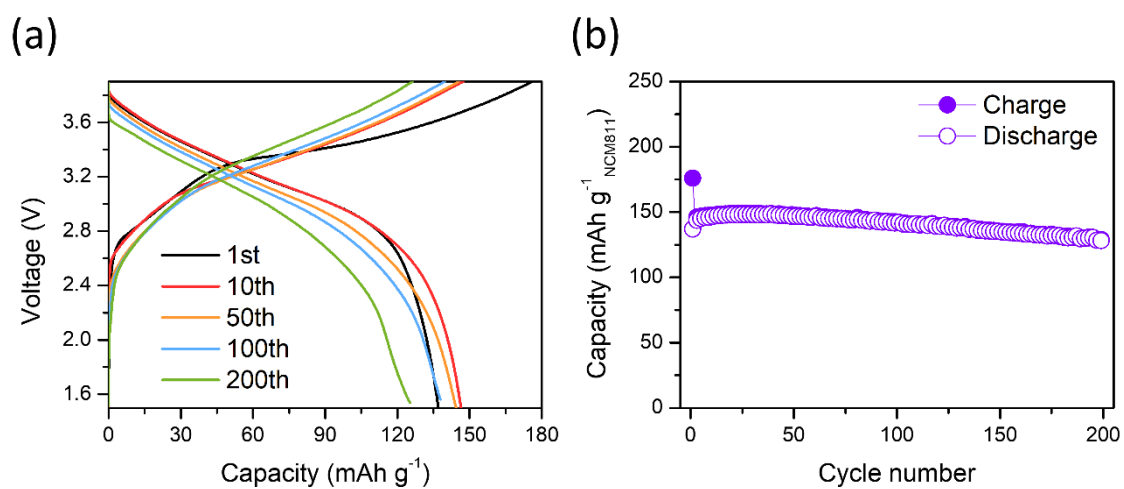

Figure S7. (a) Voltage profiles and (b) cycling performances of Zn-Li<sub>3</sub>V<sub>2</sub>O<sub>5</sub>||NCM 811 full cell at 100 mA g<sup>-1</sup>.

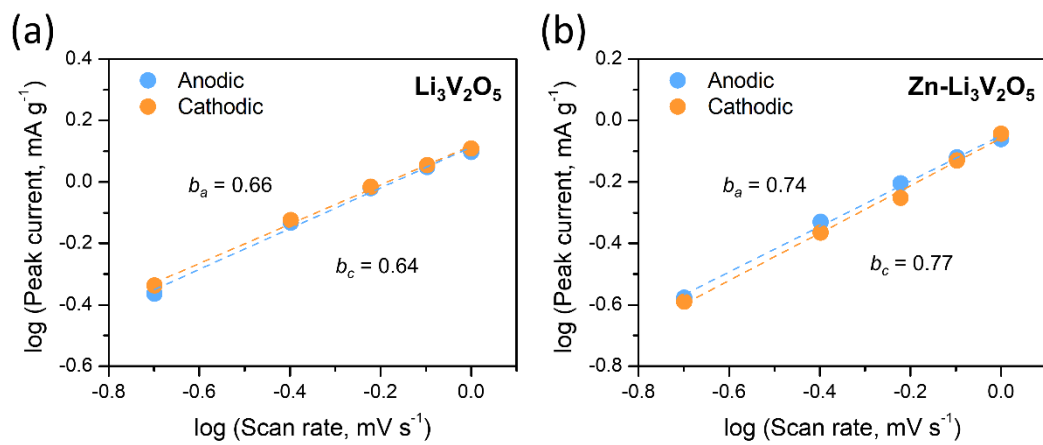

Figure S8.  $b$  values calculated from the log (Scan rate) vs. log (Peak current) curves.
